# Supplementary material for: Engineered 3D-printed Bi 4 O 5 I 2 @hematite scaffolds for visible light photocatalytic degradation of cresols
Source: Royal Society of Chemistry journal article supplement (doi:10.1039/d5ta07867a), 2025-11-18
Supplement: d5ta07867a1.pdf [file d5ta07867a1.pdf]

SUPPORTING INFORMATION

**Engineered 3D-Printed Bi<sub>4</sub>O<sub>5</sub>I<sub>2</sub>@Hematite Scaffolds for Visible Light Photocatalytic Degradation of Cresols**

Akash Rawat<sup>a,†</sup>, Raphael B. de Oliveira<sup>b,c,†</sup>, Tapas Pal<sup>d</sup>, Kleuton A. L. Lima<sup>c</sup>, Guilherme S. L. Fabris<sup>c</sup>, Raphael M. Tromer<sup>e</sup>, Marcelo L. Pereira Junior<sup>b,f</sup>, Adarsh Singh<sup>g</sup>, Ashok Kumar Gupta<sup>g,\*</sup>, Douglas S. Galvão<sup>c,\*</sup>, Chandra Sekhar Tiwary<sup>h,\*</sup>

<sup>a</sup> School of Environmental Science and Engineering, Indian Institute of Technology  
Kharagpur, Kharagpur 721302, India.

<sup>b</sup> Materials Science and Nano Engineering Department, Rice University, Houston, TX, 77005,  
USA.

<sup>c</sup> Applied Physics Department and Center for Computational Engineering & Sciences, State  
University of Campinas, Campinas, São Paulo 13083-970, Brazil.

<sup>d</sup> School of Nanoscience and Technology, Indian Institute of Technology  
Kharagpur, Kharagpur 721302, India.

<sup>e</sup> University of Brasília, Institute of Physics, Brasilia 70910900, Federal District, Brazil.

<sup>f</sup> University of Brasília, College of Technology, Department of Electrical Engineering,  
Brasilia 70910900, Federal District, Brazil.

<sup>g</sup> Environmental Engineering Division, Department of Civil Engineering, Indian Institute of  
Technology Kharagpur, Kharagpur - 721302, India.

<sup>h</sup> Metallurgical and Materials Engineering, Indian Institute of Technology Kharagpur,  
Kharagpur - 721302, India.

\*Corresponding authors (Email: [agupta@civil.iitkgp.ac.in](mailto:agupta@civil.iitkgp.ac.in);  
[chandra.tiwary@metal.iitkgp.ac.in](mailto:chandra.tiwary@metal.iitkgp.ac.in); [galvao@ifi.unicamp.br](mailto:galvao@ifi.unicamp.br))

<sup>†</sup>Equal contribution

## 37 **S1. Materials and chemical reagents**

38 Bismuth (III) nitrate pentahydrate ( $\text{Bi}(\text{NO}_3)_3 \cdot 5\text{H}_2\text{O}$ ;  $\geq 99\%$  purity), Potassium iodide (KI;  $\geq$   
39  $99\%$  purity), Ethylene glycol ( $\text{C}_2\text{H}_6\text{O}_2$ ;  $\geq 99\%$  purity), Sodium hydroxide (NaOH;  $\geq 99\%$   
40 purity), Hydrochloric acid (HCl; 35%), Ethanol ( $\text{C}_2\text{H}_5\text{OH}$ ;  $\geq 99.9\%$ ). Ascorbic acid ( $\text{C}_6\text{H}_8\text{O}_6$ ;  $\geq$   
41  $99.9\%$ ), Silver nitrate ( $\text{AgNO}_3$ ), and 2-propanol ( $\text{C}_3\text{H}_8\text{O}$ ;  $\geq 99.99\%$  purity). Carboxymethyl  
42 cellulose (CMC, as binder). Cresol isomers used in this study: *p*-cresol ( $\text{C}_6\text{H}_5\text{OH}$ ;  $\geq 99\%$   
43 purity), *o*-cresol ( $\text{C}_6\text{H}_5\text{OH}$ ;  $\geq 99\%$  purity), and *m*-cresol ( $\text{C}_6\text{H}_5\text{OH}$ ;  $\geq 99\%$  purity). All of the  
44 chemicals were used in analytical grade without further purification and purchased from Merck  
45 India.

## 46 **S2. Instrumentation and characterization**

47 The surface morphology of specimens was analyzed using high-resolution field emission gun  
48 scanning electron microscopy (FEG-SEM: Zeis Merlin Gemini II). Malvern PANalytical  
49 X'Pert Powder recorded the X-ray diffraction (XRD) pattern of as-fabricated materials.  
50 Electron paramagnetic resonance (EPR) spectroscopy (Bruker Corporation ELEXSYS)  
51 detected the principal ROS released during photocatalysis. The leaching of Fe and Bi ions was  
52 measured by multi-elemental scans using inductively coupled plasma optical emission  
53 spectroscopy (ICP-OES: iCAP PRO, Thermo Scientific, USA). The intermediates of *p*-cresol  
54 after certain intervals were identified by liquid chromatography-tandem mass spectrometry  
55 (LC-MS/MS: WATERS 2695, USA).

56 The concentrations of cresols in suspension were analyzed using high-performance liquid  
57 chromatography (HPLC: Thermo Fisher Scientific, Ultimate 3000). A reverse-phase C18  
58 column measuring  $4.6 \text{ cm} \times 250 \text{ mm}$  was employed. Total organic carbon (TOC) analyzer  
59 (TOC-L Series, Shimadzu, Japan), ion chromatography (IC: Dionex, ICS-2100, Thermo  
60 Scientific, USA), chemical oxygen demand (COD) digester (HACH, DRB200), and UV-Vis  
61 Spectrophotometer (Agilent Cary 60).

### 62 S3. Detailed experimental setup

63 Fig. S1a, shows the picture of a bench-top experimental setup used in this study for the  
64 photocatalytic degradation of cresols. This setup consists of several components, including a  
65 visible light source (Lumina 50 Watts LED, 6500 K cool daylight with a luminous flux of 105  
66 lm/w), a hot plate magnetic stirrer (Tarsons digital spinnot), a jacketed beaker of 200 mL  
67 capacity, a 60-watt peristaltic pump (RAVEL, model no. RH-P1205), water recirculation  
68 chamber (referred to as WRC; of 1000 mL beaker). Moreover, the zoomed-in image of the  
69 photocatalytic reactor (Fig. S1b) unveils the other components, such as the hanging stainless  
70 steel frame for holding the  $\text{Bi}_4\text{O}_5\text{I}_2@3\text{DH}$  scaffold.

71 Fig. S1 illustrates the experimental setup, where an LED light was positioned 5 cm above the  
72 jacketed beaker. Inside the beaker, the  $\text{Bi}_4\text{O}_5\text{I}_2/3\text{DH}$  scaffold was placed on a stainless steel  
73 frame and immersed in the cresol solution. Water circulated through the outer jacket to provide  
74 cooling, maintaining the solution temperature at  $25 \pm 5^\circ\text{C}$ . Chilled water was pumped from the  
75 WRC through a dedicated bottom inlet, which filled the outer jacket and exited through a top  
76 outlet. The warmed water was then returned to the WRC for mixing and recirculation.

### 77 S4. Experimental procedure

78 During photocatalysis, 2 mL samples were collected and filtered using a PVDF 0.2  $\mu\text{m}$   
79 (Agilent) syringe filter. The filtered samples were then analyzed by HPLC to determine the  
80 concentrations of cresol isomers.

81 The mobile phase used in HPLC was a mixture of acetonitrile and DI water in a 60:40 (V/V)  
82 ratio, with a detection wavelength set at 272 nm. The flow rate was kept constant at 1 mL/min,  
83 allowing for the detection of *p*-cresol, *o*-cresol, and *m*-cresol at retention times of 4.2, 4.35, and  
84 4.3 minutes, respectively. Moreover, the TOC removal and degradation efficiency were  
85 calculated using the procedure explained in our previous study.<sup>12</sup>

## 86 S5. DFT calculations

87 The interaction process and the electronic properties of the  $\text{Bi}_4\text{O}_5\text{I}_2$ /Hematite interface were  
88 investigated using Density Functional Theory with Hubbard correction (DFT+ $U$ ),<sup>3</sup> as  
89 implemented in the Spanish Initiative for Electronic Simulations with Thousands of Atoms  
90 (SIESTA) code.<sup>4,5</sup> Exchange-correlation effects were treated within the Generalized Gradient  
91 Approximation using the Perdew-Burke-Ernzerhof functional,<sup>6</sup> combined with a double- $\zeta$   
92 polarized basis set composed of numerical atomic orbitals. A mesh cutoff of 350 Ry was  
93 employed in all simulations. Structural optimizations were carried out until all residual atomic  
94 forces were below 0.05 eV/Å. A Monkhorst-Pack  $\Gamma$ -centered  $\mathbf{k}$ -point mesh was used, with a  
95  $3\times 3\times 1$  sampling for monolayers and  $3\times 3\times 3$  for bulk systems.<sup>7</sup> For systems containing Fe  
96 atoms, a Hubbard  $U$  value of 6.0 eV was applied to account for the on-site Coulomb interaction  
97 of localized 3d orbitals.<sup>8</sup>

98 Initially, we analyzed the bulk structures of hematite (Fig. S2a) and  $\text{Bi}_4\text{O}_5\text{I}_2$  (Fig. S2b). The  
99 unit cells consist of 30 atoms for hematite and 44 atoms for  $\text{Bi}_4\text{O}_5\text{I}_2$ . To model the  
100  $\text{Bi}_4\text{O}_5\text{I}_2$ /hematite interface, we created a  $4\times 4\times 1$  hematite supercell composed of 320 atoms (Fig.  
101 S2c). A (001) monolayer of hematite was selected due to its higher structural stability, as  
102 demonstrated in previous works.<sup>9–11</sup> A vacuum layer of 40 Å was added along the  $z$ -direction  
103 to prevent interactions between periodic images. The monolayer was treated as a substrate,  
104 with periodicity maintained along the  $x$  and  $y$  directions, reproducing the configuration  
105 commonly observed in experimental settings.

106 To simulate the deposition process, a flake of  $\text{Bi}_4\text{O}_5\text{I}_2$  was positioned above the hematite  
107 monolayer. This flake was generated by removing the periodic boundary conditions from the  
108  $\text{Bi}_4\text{O}_5\text{I}_2$  unit cell, treating it as a discrete, non-periodic cluster. Its initial vertical position,  
109 approximately 3.5 Å above the substrate, was determined using the Adsorption Locator module

110 from the Materials Studio suite.<sup>12</sup> This method employs a Monte Carlo algorithm to generate  
111 and evaluate multiple initial configurations of the adsorbate on the surface. Each configuration  
112 is assessed using an empirical force field to estimate its potential energy, and the configuration  
113 with the lowest energy is selected as the most favorable adsorption site. This configuration was  
114 then used as the starting point for complete relaxation of the heterostructure. The final geometry  
115 obtained is consistent with trends reported in previous experimental studies.

## 116 **S6. Plausible degradation pathways of *p*-cresol**

117 As depicted in Fig. 7a, the photoinduced degradation of *p*-cresol follows a couple of tentative  
118 pathways, mainly driven by OH radicals. In the first path, *p*-cresol ( $m/z$  108.5) is attacked on  
119 the ortho position, resulting in the aromatic ring hydroxylation, which may form 4-methyl  
120 catechol ( $m/z$  124.03).<sup>13</sup> Parallely, the second pathways start with the oxidation of the methyl  
121 group on the aromatic ring, leading to the formation of 3,4-Dihydroxybenzoic acid ( $m/z$  155.4)  
122 via the formation of 4-Hydroxybenzyl alcohol ( $m/z$  124.12)<sup>13</sup> and 4-Hydroxybenzaldehyde  
123 ( $m/z$  122.1) after reacting with OH, which is further oxidized into 2,4-Dihydroxybenzaldehyde  
124 ( $m/z$  138.12) and 4-Hydroxybenzoic acid ( $m/z$  138.12).<sup>13</sup> Although 4-Hydroxybenzyl Alcohol,  
125 4-Dihydroxybenzaldehyde ( $m/z$  138.12)<sup>14</sup> and 4-Hydroxybenzoic<sup>13</sup> acid were not detected in  
126 this study, they were still included due to their significance reported in previous studies.  
127 Interestingly, both plausible pathways converge at the subsequent generation of 3,4-  
128 Dihydroxybenzoic acid ( $m/z$  155.4), which further undergoes the ortho-cleavage pathway.  
129 Thereafter, it ends up with open rings moieties, such as 2-butanol ( $m/z$  75), acrolein ( $m/z$  56),  
130 glycerol ( $m/z$  92), oxalic acid ( $m/z$  90), acetic acid ( $m/z$  61), fumaric acid ( $m/z$  116), ethylene  
131 glycol ( $m/z$  62), and glycolic acid ( $m/z$  77), which are mineralized into CO<sub>2</sub> and H<sub>2</sub>O.<sup>1,2</sup>

132

133 Table S1: Parameters used in DIW for the hematite grid printing.

| Parameters      | Value               |
|-----------------|---------------------|
| Slice height    | 0.6 mm              |
| Nozzle diameter | 1.2 mm              |
| Speed           | 1 mm/sec            |
| Infill pattern  | Grid                |
| Infill density  | 50%                 |
| Temperature     | Room<br>Temperature |

Table S2. The predicted results for the intermediate and degradation products (IDPs) of p-cresol with corresponding toxicity profiles.<sup>15</sup>

| Parent compound or degradation product | Name and m/z ratio                   | Chemical structure                                                                  | Predicted acute toxicity (mg/L)* |                            | Binary endpoint toxicity measures <sup>†</sup> |              |                   |
|----------------------------------------|--------------------------------------|-------------------------------------------------------------------------------------|----------------------------------|----------------------------|------------------------------------------------|--------------|-------------------|
|                                        |                                      |                                                                                     | Daphnia magna LC50 (48 h)        | Fathead minnow LC50 (96 h) | Developmental toxicity                         | Mutagenicity | Bio-concentration |
| TP-0                                   | p-Cresol (m/z 107)                   |    | 6.57                             | 28.79                      | 0.21                                           | 0.06         | 9.39              |
| TP1 <sup>13</sup>                      | 4-Methyl catechol (m/z 123.04)       |    | 7.48                             | 26.97                      | 0.24                                           | 0.31         | 4.7               |
| TP-2 <sup>13</sup>                     | 4-Hydroxybenzaldehyde (m/z 122)      |   | 6.12                             | 15.91                      | 0.20                                           | 0.11         | NA                |
| TP-3 <sup>13</sup>                     | 4-Hydroxybenzyl Alcohol (m/z 124.14) |  | 11.75                            | 51.74                      | 0.17                                           | -0.12        | 3.75              |

|                    |                                           |                                                                                     |         |          |      |      |      |
|--------------------|-------------------------------------------|-------------------------------------------------------------------------------------|---------|----------|------|------|------|
| TP-4 <sup>14</sup> | 2,4-Dihydroxybenzaldehyde<br>(m/z 138.12) | 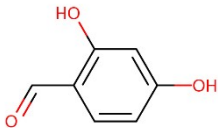   | 9.21    | 16.17    | 0.18 | 0.19 | NA   |
| TP-5 <sup>13</sup> | 4-Hydroxybenzoic acid<br>(m/z 138)        |    | 55.72   | 92.62    | 0.32 | 0.27 | 1.54 |
| TP-6               | 3,4-Dihydroxybenzoic acid<br>(m/z 155.4)  |    | 50.41   | 83.60    | 0.46 | 0.15 | 1.05 |
| X1 <sup>1,2</sup>  | 2-butanol<br>(m/z 75)                     |   | 229.09  | 919.73   | 0.6  | 0.01 | 2.92 |
| X2 <sup>1,2</sup>  | Acrolein<br>(m/z 56)                      |  | 36.06   | 8.87     | 0.64 | 0.51 | NA   |
| X3 <sup>1,2</sup>  | Glycerol<br>(m/z 92)                      |  | 6304.90 | 10970.21 | 0.47 | 0.12 | 0.57 |



|                   |                             |                                                                                   |         |         |      |       |      |
|-------------------|-----------------------------|-----------------------------------------------------------------------------------|---------|---------|------|-------|------|
| X4 <sup>1,2</sup> | Oxalic acid<br>(m/z 90)     | 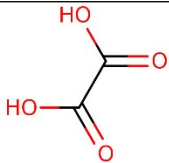 | 1445.45 | 702.23  | 0.56 | 0.30  | 0.17 |
| X5 <sup>1,2</sup> | Acetic acid<br>(m/z 61)     |  | 1035.97 | 762.37  | 0.71 | -0.06 | 0.60 |
| X6 <sup>1,2</sup> | Fumaric acid<br>(m/z 116),  |  | 201.03  | 187.87  | 0.79 | 0.19  | 0.53 |
| X7 <sup>1,2</sup> | Ethylene glycol<br>(m/z 62) |  | 2898.89 | 5701.09 | 0.28 | -0.03 | 0.74 |
| X8 <sup>1,2</sup> | Glycolic acid<br>(m/z 77)   |  | 3323.98 | 2075.11 | 0.53 | 0.08  | 0.31 |

*\*Very Toxic ( $\leq 1$  mg/L), Toxic (1–10 mg/L), Harmful (10–100 mg/L), and non-toxic ( $\geq 100$  mg/L)<sup>16</sup>*

*<sup>†</sup>if calculated score < 0.5, then activity = negative else if calculated score  $\geq 0.5$ , then activity = positive<sup>16</sup>*

Table S3. Physico-chemical characteristics of real water matrices.

| <b>Parameters</b>                                   | <b>DI<br/>water</b> | <b>Tap water</b> | <b>Pond water</b> | <b>Secondary<br/>treatment<br/>effluent</b> |
|-----------------------------------------------------|---------------------|------------------|-------------------|---------------------------------------------|
| pH                                                  | 6.5 ± 2             | 7.2 ± 0.15       | 6.45 ± 0.3        | 6.7 ± 0.5                                   |
| Turbidity (NTU)                                     | BDL                 | 0.65 ± 0.2       | 10.5 ± 0.3        | 25.5 ± 2                                    |
| TSS (mg/L)                                          | BDL                 | 5 ± 0.4          | 40 ± 0.5          | 55 ± 0.5                                    |
| TDS (mg/L)                                          | BDL                 | 97 ± 5           | 150 ± 5           | 355 ± 5                                     |
| Chloride (as Cl <sup>-</sup> , mg/L)                | BDL                 | 5.5 ± 0.5        | 58.13 ± 2.5       | 75.2 ± 1                                    |
| Sulfate (SO <sub>4</sub> <sup>2-</sup> , mg/L)      | BDL                 | 2.1 ± 0.5        | 23.8 ± 0.8        | 18.6 ± 0.5                                  |
| Nitrate (NO <sub>3</sub> <sup>-</sup> , mg/L)       | BDL                 | BDL              | 26.65 ± 4.5       | 75.23 ± 2.5                                 |
| Phosphate (as PO <sub>4</sub> <sup>3-</sup> , mg/L) | BDL                 | BDL              | 10.3 ± 1          | 26.2 ± 0.2                                  |
| COD (mg/L)                                          | BDL                 | BDL              | 95 ± 5            | 72 ± 5                                      |

Table S4. Comparison of cresol photocatalytic degradation performance of Bi<sub>4</sub>O<sub>5</sub>I<sub>2</sub>@3DH scaffold and other reported immobilized photocatalyst systems degrading phenolic compounds.

| Photocatalyst system<br>(Catalyst@Substrate)                               | Catalyst                                                                 | Substrate                           | Immobilization<br>Method | Light source<br>(Power)                    | Pollutant                                                                      | Removal<br>efficiency<br>(Reaction time)        |
|----------------------------------------------------------------------------|--------------------------------------------------------------------------|-------------------------------------|--------------------------|--------------------------------------------|--------------------------------------------------------------------------------|-------------------------------------------------|
| TiO <sub>2</sub> @Steel <sup>17</sup>                                      | TiO <sub>2</sub>                                                         | Steel                               | Sol-gel                  | 365 nm UV-LED (400 W m <sup>-2</sup> )     | Phenol (50 mg/L)                                                               | 100% (3 h)                                      |
| NiO/TiO <sub>2</sub> @SSM <sup>18</sup>                                    | NiO/TiO <sub>2</sub>                                                     | Stainless steel (SSM)               | Hydrothermal             | 254 nm UV-C (36 W)                         | Bisphenol A (10 mg/L)                                                          | 96% (2 h)                                       |
| BCI-CN-PPF <sup>19</sup>                                                   | BiOCl <sub>0.75</sub> I <sub>0.25</sub> /g-C <sub>3</sub> N <sub>4</sub> | Polyolefin polyester fiber (PPF)    | Hydrothermal             | 420 nm Xenon lamp (500 W)                  | Bisphenol A (10 mg/L)                                                          | 100% (1 h)                                      |
| S-TiO <sub>2</sub> @Glass <sup>20</sup>                                    | S-TiO <sub>2</sub>                                                       | Glass plate                         | Spray-coating            | 315 - 610 nm Visible light                 | Benzoic acid (20 mg/L)                                                         | 41% (2 h)                                       |
| CeO <sub>2</sub> @Cellulose <sup>21</sup>                                  | CeO <sub>2</sub>                                                         | Cellulose acetate                   | Solution casting         | 375 nm Hg-Xe lamp (15 mW/cm <sup>2</sup> ) | 4-nitrophenol (~ 14 mg/L)                                                      | 97.7% (2.5 h)                                   |
| rGO/ZrO <sub>2</sub> /Ag <sub>3</sub> PO <sub>4</sub> @Glass <sup>22</sup> | rGO/ZrO <sub>2</sub> /Ag <sub>3</sub> PO <sub>4</sub>                    | Glass                               | Spin coating             | UV light                                   | 4-nitrophenol                                                                  | 92% (2.5 h)                                     |
| TiO <sub>2</sub> @Sand <sup>23</sup>                                       | TiO <sub>2</sub>                                                         | Sand                                | Epoxy coating            | UV-A (60 W/m <sup>2</sup> )                | Phenol (25 mg/L)                                                               | 50% (4 h)                                       |
| <b>Bi<sub>4</sub>O<sub>5</sub>I<sub>2</sub>@3DH<br/>(Present study)</b>    | <b>Bi<sub>4</sub>O<sub>5</sub>I<sub>2</sub>/hematite</b>                 | <b>3D printed hematite scaffold</b> | <b>Dip coating</b>       | <b>Visible LED (50 W)</b>                  | <b><i>p</i>-cresol;<br/><i>o</i>-cresol;<br/><i>m</i>-cresol<br/>(20 mg/L)</b> | <b>99.78%;<br/>99.80%;<br/>99.23%<br/>(4 h)</b> |

## List of figures of ESI

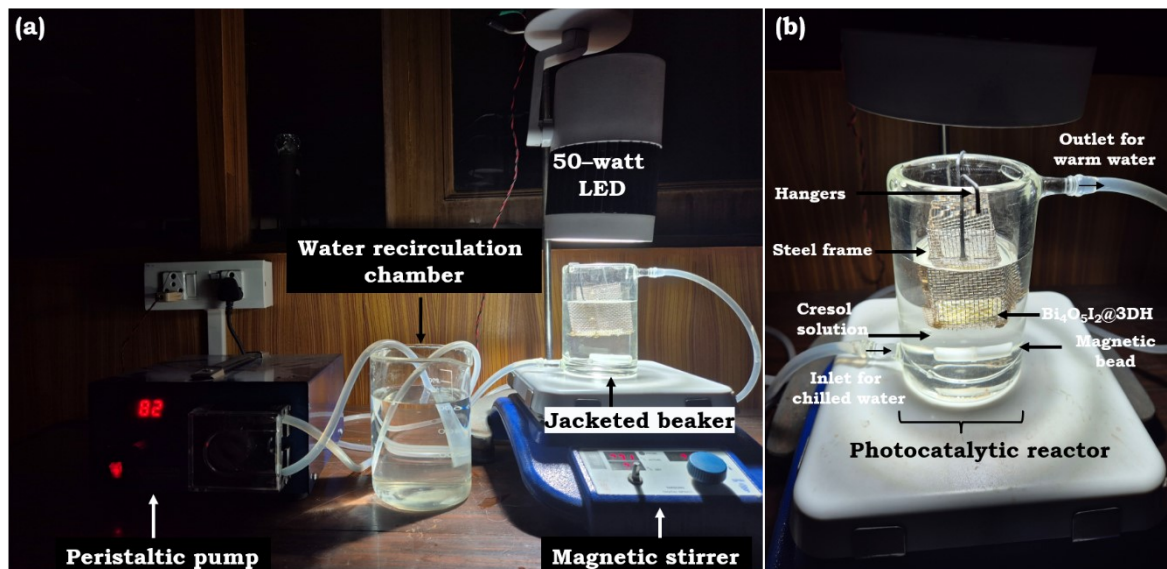

**Fig. S1.** (a) Bench-top photocatalytic experimental setup with water recirculation arrangement for maintaining the internal temperature of aqueous cresol solution. (b) Photocatalytic reactor highlighting its components.

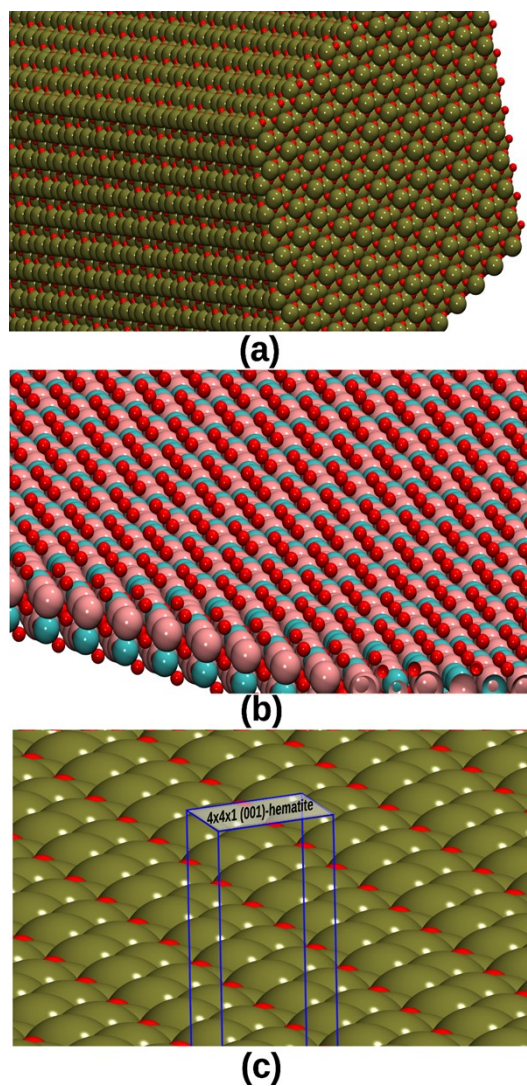

**Fig. S2.** Optimized structures: (a) bulk hematite, (b) bulk  $\text{Bi}_4\text{O}_5\text{I}_2$ , and (c) hematite (001) surface with the  $4\times 4$  supercell. Atomic species are colored as follows: red (O), blue (I), pink (Bi), and green (Fe).

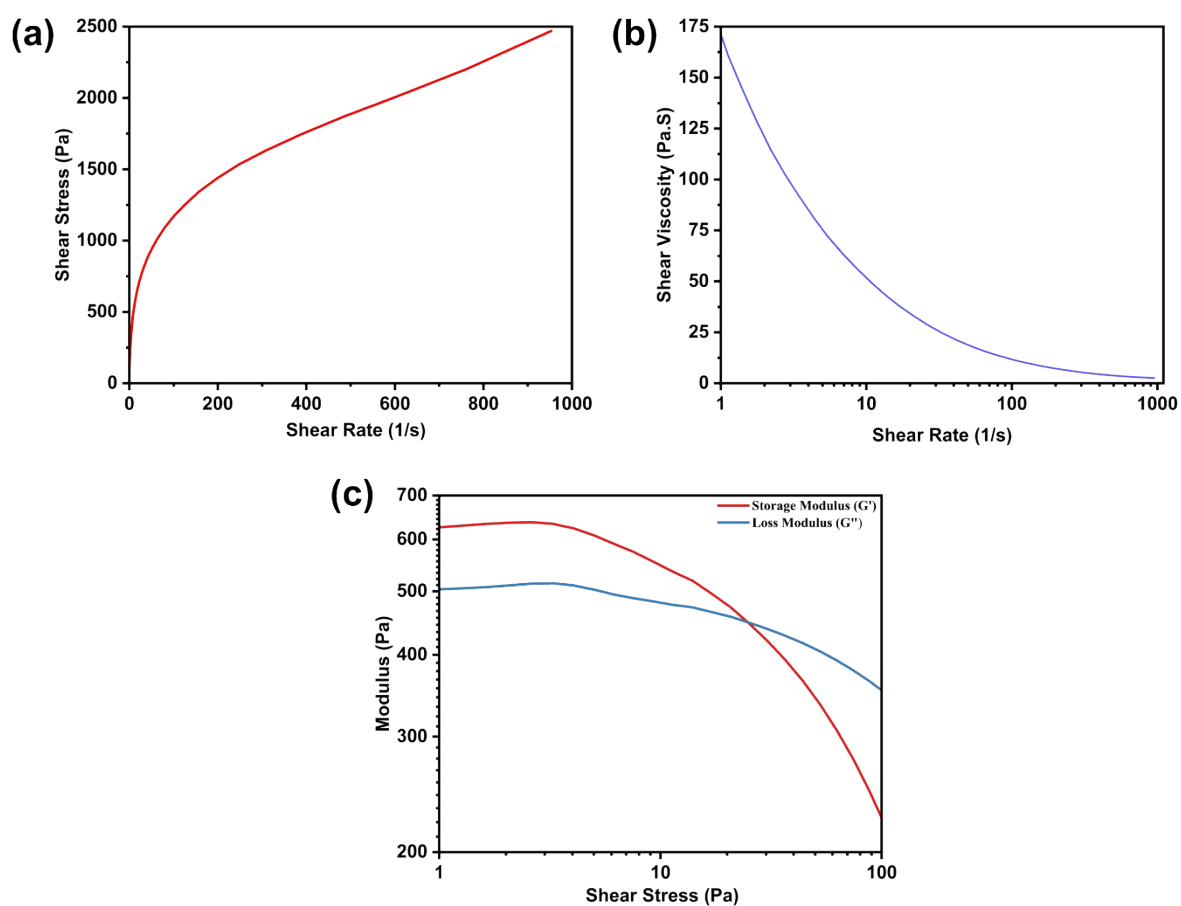

**Fig. S3.** Rheological Analysis of ink (a) Shear Stress vs Shear Rate, (b) Shear Viscosity vs Shear Rate, (c) Modulus vs Shear Stress.

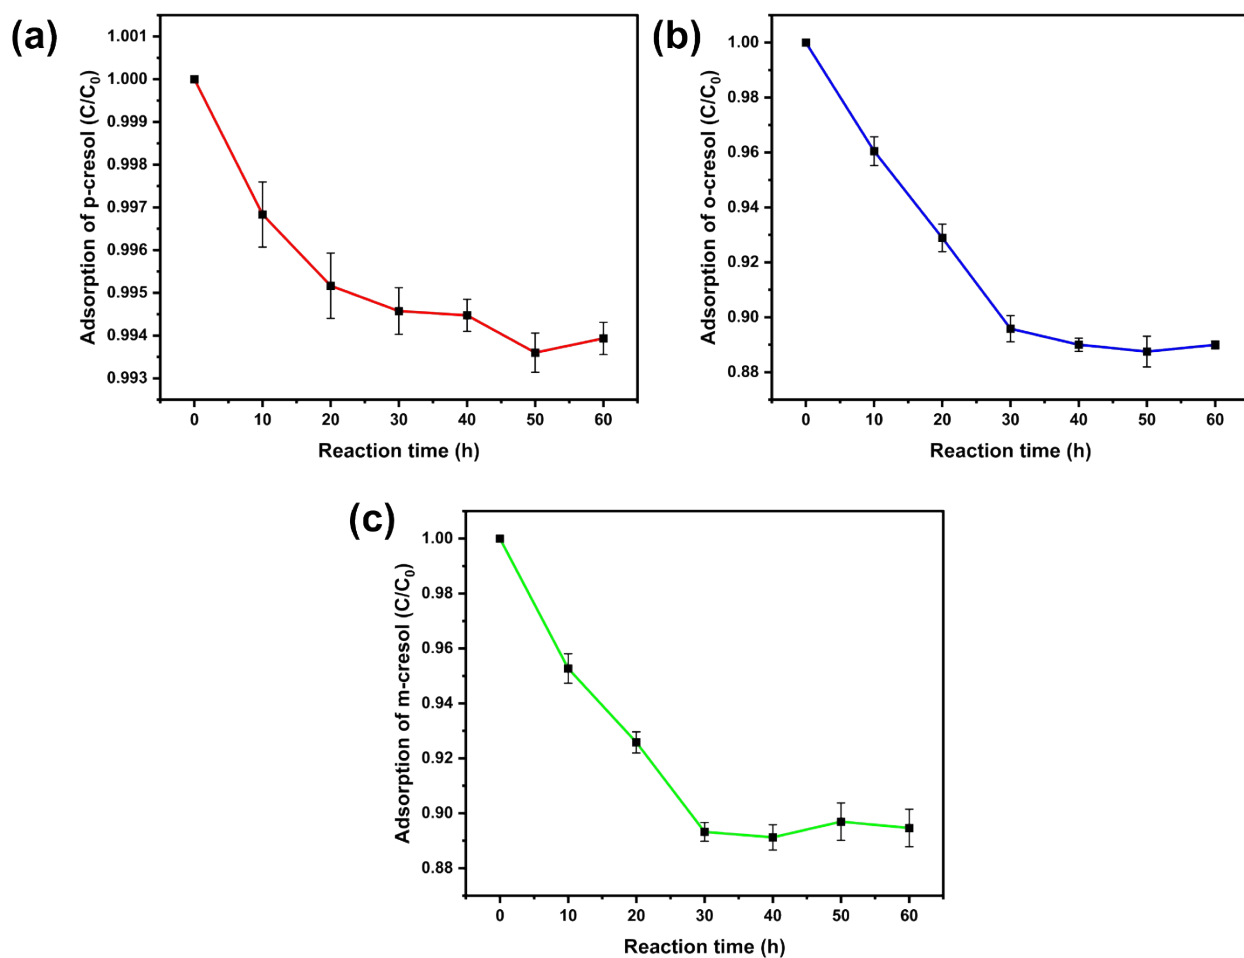

**Fig. S4.** Adsorption capacity of Bi<sub>4</sub>O<sub>5</sub>I<sub>2</sub>@3DH against the cresol isomers: (a) *p*-cresol, (b) *o*-cresol, and (c) *m*-cresol, conducted under the following operational parameters: cresol isomer concentration of 20 mg/L, infill density of 50%, five dip-coating cycles, and pH 6.5.

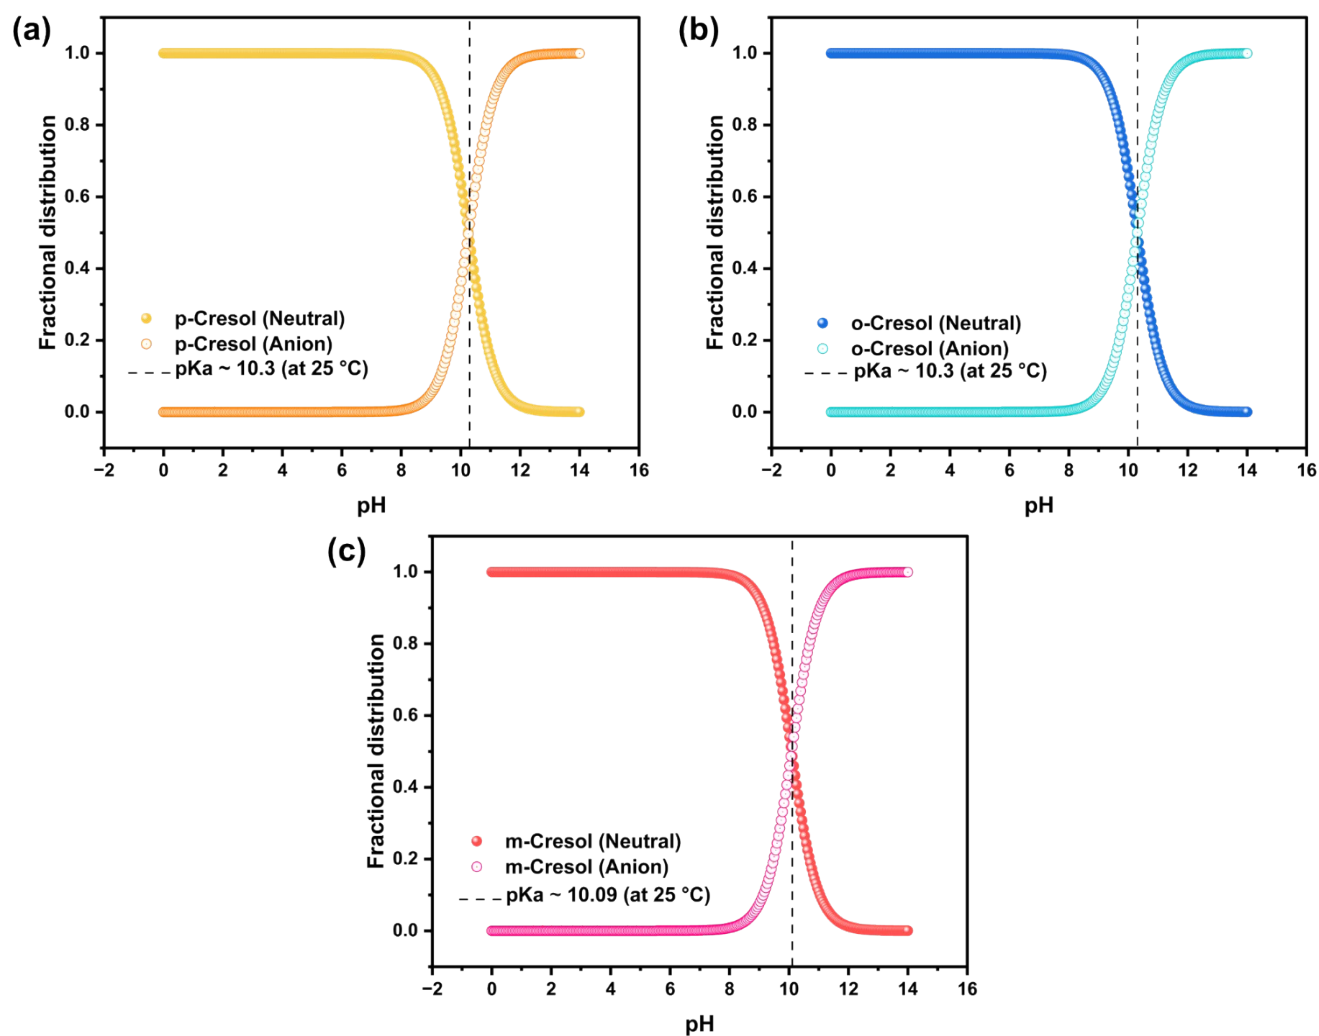

**Fig. S5.** Fractional distribution of cresol isomers at various pH: (a) *p*-cresol,<sup>24,25</sup> (b) *o*-cresol,<sup>26,27</sup> and (c) *m*-cresol.<sup>26,28</sup>



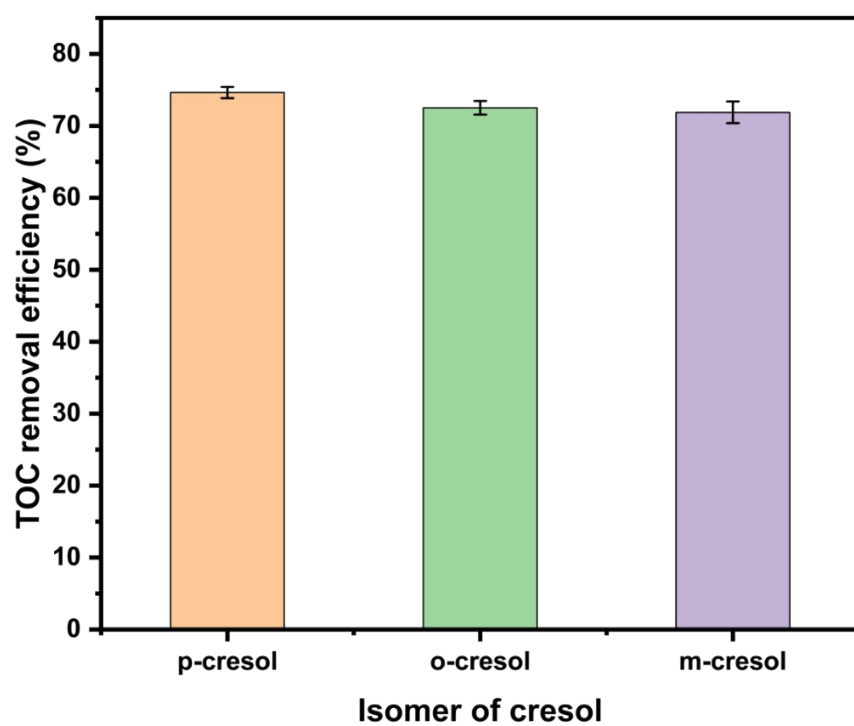

**Fig. S6.** TOC removal efficiency of individual cresol isomers (p-, o-, and m-cresol).

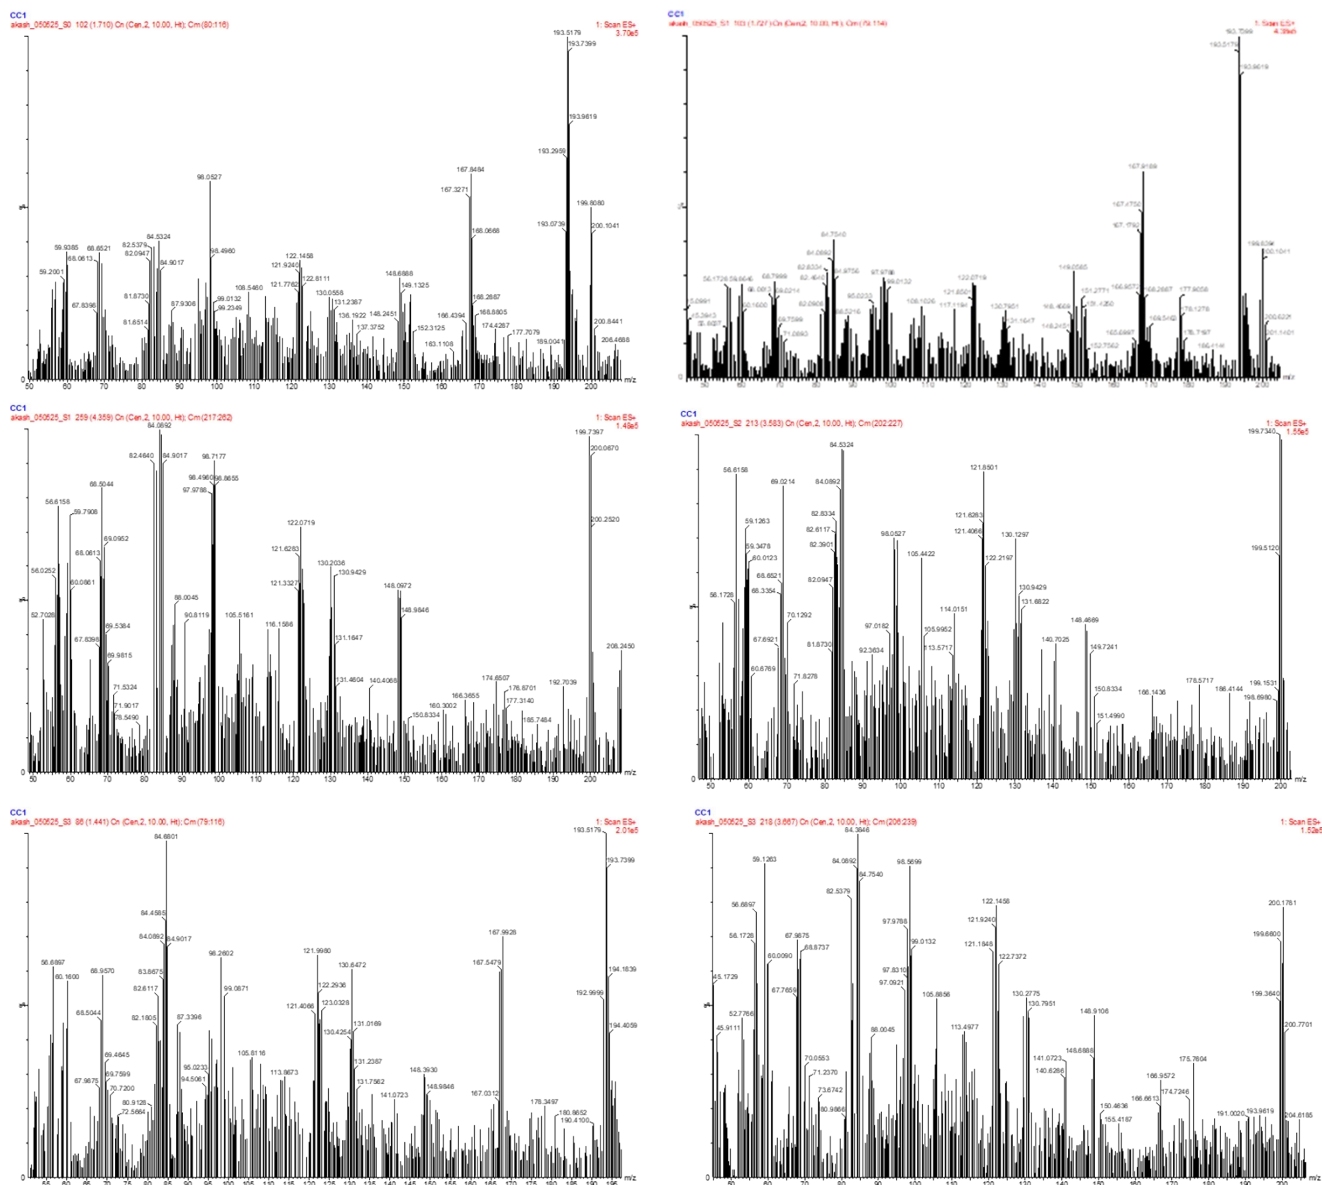

**Fig. S7.** The  $m/z$  spectra before and after the degradation of p-cresol: (i) sample extracted before photocatalysis, i.e.,  $t = -30$ , (ii and iii) after one hour of photocatalysis, i.e.,  $t = 60$ , (iv)  $t = 120$ , and (v and vi) after photocatalysis, i.e.,  $t = 240$  min.

## References

- 1 A. Rawat, S. K. Srivastava, C. S. Tiwary and A. K. Gupta, *J. Mater. Chem. A*, 2025, **13**, 1271–1286.
- 2 A. Rawat, S. K. Srivastava, C. S. Tiwary and A. K. Gupta, *J. Environ. Chem. Eng.*, 2024, **12**, 112879.
- 3 W. Kohn and L. J. Sham, *Phys. Rev.*, 1965, **140**, A1133–A1138.
- 4 J. M. Soler, E. Artacho, J. D. Gale, A. García, J. Junquera, P. Ordejón and D. Sánchez-Portal, *J. Phys. Condens. Matter*, 2002, **14**, 2745–2779.
- 5 A. García, N. Papior, A. Akhtar, E. Artacho, V. Blum, E. Bosoni, P. Brandimarte, M. Brandbyge, J. I. Cerdá, F. Corsetti, R. Cuadrado, V. Dikan, J. Ferrer, J. Gale, P. García-Fernández, V. M. García-Suárez, S. García, G. Huhs, S. Illera, R. Korytár, P. Koval, I. Lebedeva, L. Lin, P. López-Tarifa, S. G. Mayo, S. Mohr, P. Ordejón, A. Postnikov, Y. Pouillon, M. Pruneda, R. Robles, D. Sánchez-Portal, J. M. Soler, R. Ullah, V. W. Yu and J. Junquera, *J. Chem. Phys.*, , DOI:10.1063/5.0005077.
- 6 J. P. Perdew, K. Burke and M. Ernzerhof, *Phys. Rev. Lett.*, 1996, **77**, 3865–3868.
- 7 H. J. Monkhorst and J. D. Pack, *Phys. Rev. B*, 1976, **13**, 5188–5192.
- 8 N. Naveas, R. Pulido, C. Marini, J. Hernández-Montelongo and M. M. Silván, *iScience*, 2023, **26**, 106033.
- 9 T. P. Trainor, A. M. Chaka, P. J. Eng, M. Newville, G. A. Waychunas, J. G. Catalano and G. E. Brown, *Surf. Sci.*, 2004, **573**, 204–224.
- 10 N. Dzade, A. Roldan and N. De Leeuw, *Minerals*, 2014, **4**, 89–115.
- 11 R. L. Blake, R. E. HessevicK, T. Zoltai and L. W. Finger, *Am. Mineral.*, 1966, **51**, 123–129.
- 12 D.S. Biovia, Material Studio, Dassault Systemes, <https://www.3ds.com/products/biovia/materials-studio>.
- 13 R. Khunphonoi and N. Grisdanurak, *Chem. Eng. J.*, 2016, **296**, 420–427.
- 14 Y. Ling, X. Fei, Q. Shan, D. Hei and W. Jia, *J. Radioanal. Nucl. Chem.*, 2018, **316**, 993–999.

- 15 E. CCTE, 2022.
- 16 GHS, *Globally Harmonized System of Classification and Labeling of Chemicals (GHS)*, 2021.
- 17 M. Schwarze, S. Borchardt, M. L. Frisch, J. Collis, C. Walter, P. W. Menezes, P. Strasser, M. Driess and M. Tasbihi, *Nanomaterials*, 2023, **13**, 1249.
- 18 N. Kim, M. Ali, H. Anwer, J.-W. Park and I. Irfan, *Chemosphere*, 2022, **308**, 136425.
- 19 Y. Qin, B. Yang, H. Li and J. Ma, *Sci. Total Environ.*, 2022, **842**, 156828.
- 20 L. Balassa, Á. Ágoston, Z. Kása, V. Hornok and L. Janovák, *J. Mol. Struct.*, 2022, **1260**, 132860.
- 21 V. Melinte, A.-L. Chibac-Scutaru, M. E. Culica and S. Coseri, *Appl. Surf. Sci.*, 2021, **565**, 150494.
- 22 H. Anwer and J.-W. Park, *J. Hazard. Mater.*, 2019, **369**, 375–383.
- 23 Y. K. Abdel-Maksoud, E. Imam and A. R. Ramadan, *Catal. Today*, 2018, **313**, 55–62.
- 24 National Center for Biotechnology Information, PubChem Compound Summary for CID 2879, P-Cresol, <https://pubchem.ncbi.nlm.nih.gov/compound/P-Cresol>.
- 25 P. J. Pearce and R. J. J. Simkins, *Can. J. Chem.*, 1968, **46**, 241–248.
- 26 W.-Y. Shiu, K.-C. Ma, D. Varháníčková and D. Mackay, *Chemosphere*, 1994, **29**, 1155–1224.
- 27 National Center for Biotechnology Information (2025), PubChem Compound Summary for CID 335, O-Cresol, <https://pubchem.ncbi.nlm.nih.gov/compound/O-Cresol>.
- 28 National Center for Biotechnology Information (2025), PubChem Compound Summary for CID 342, M-Cresol, <https://pubchem.ncbi.nlm.nih.gov/compound/M-Cresol>.
